# Supplementary material for: Intensified Influenza Virus Production in Suspension HEK293SF Cell Cultures Operated in Fed-Batch or Perfusion with Continuous Harvest
Source: MDPI journal article supplement (doi:10.3390/vaccines11121819), 2023-12-05
Supplement: s1 [file s1]

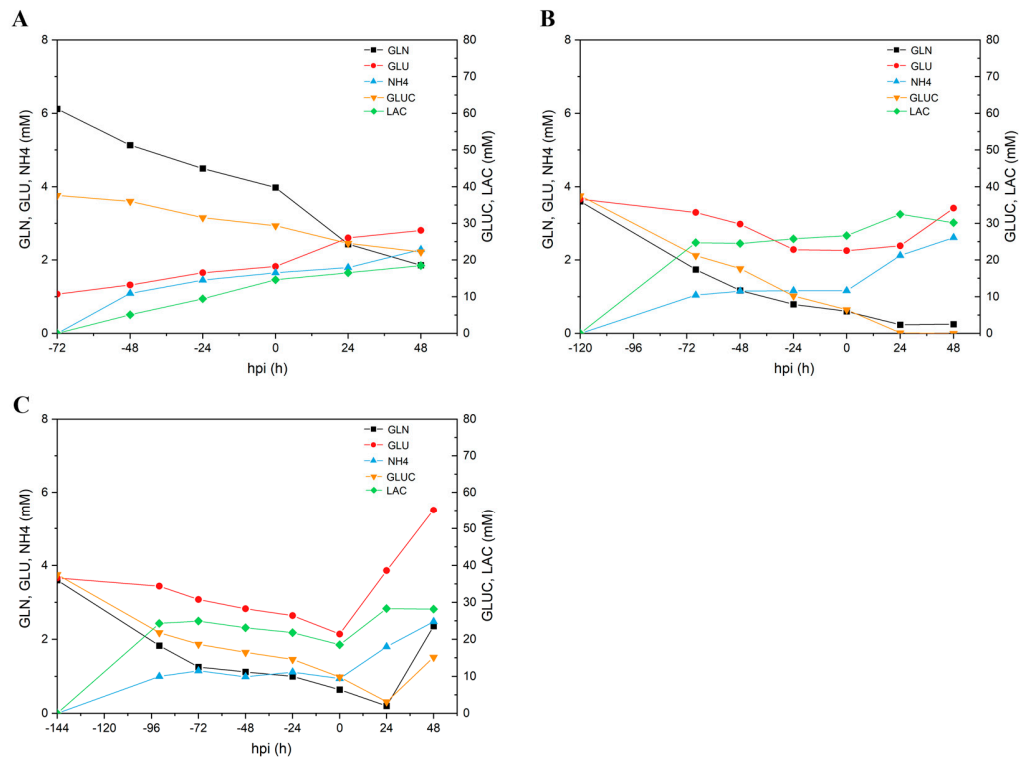

**Figure S1** Nutrient and metabolite profile for 50 mL shake-tube cultures of HEK293SF cells for influenza virus production, consisting of: (A) low cell density batch (ST-B, infected at  $2 \times 10^6$  cells/mL), (B) medium cell density batch (ST-B<sub>M</sub>, infected at  $4 \times 10^6$  cells/mL) and (C) high cell density 0.5 VVD pseudo-perfusion (ST-P<sub>H</sub>, infected at  $13 \times 10^6$  cells/mL). As supernatant samples were taken before media exchange or feeding, the concentration of nutrients/metabolites immediately after media exchange or feeding are not presented in the graphs.

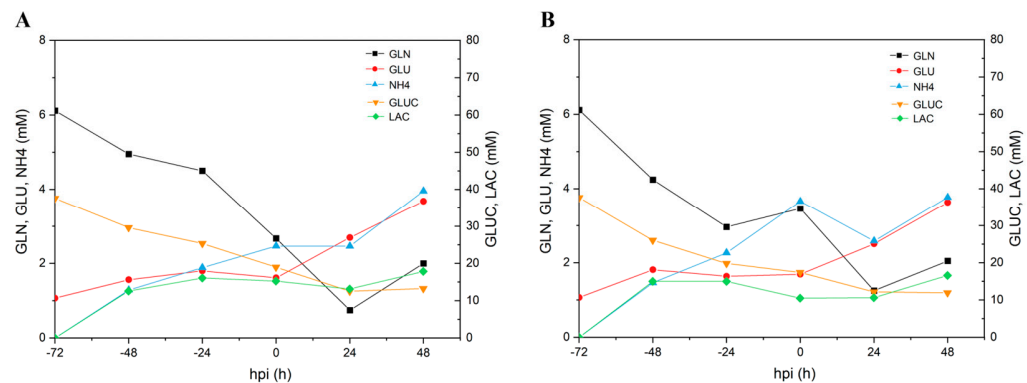

**Figure S2** Nutrient and metabolite profile for 50 mL shake-tube cultures of HEK293SF cells for influenza virus production, consisting of: (A) pseudo-perfusion (ST-P<sub>HCD</sub>, infected at  $9.5 \times 10^6$  cells/mL), and (B) hybrid fed-batch/pseudo-perfusion (ST-FB<sub>HCD</sub>, infected at  $8.5 \times 10^6$  cells/mL).

As supernatant samples were taken before media exchange or feeding, the concentration of nutrients/metabolites immediately after media exchange or feeding are not presented in the graph.

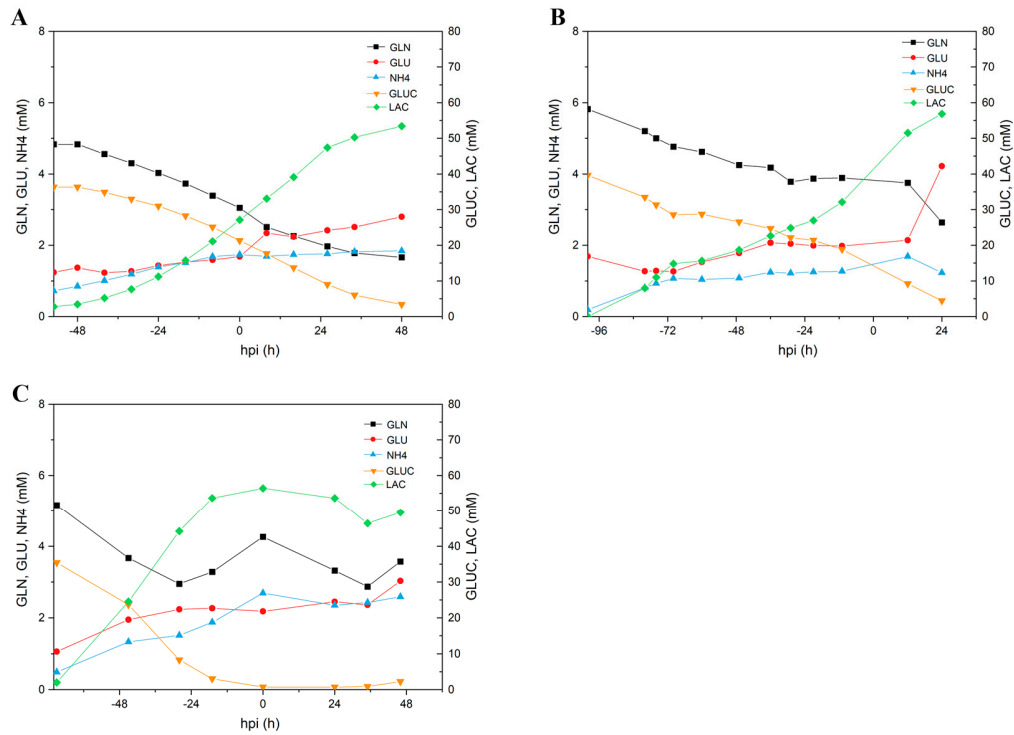

**Figure S3** Nutrient and metabolite profile for 3 L STR bioreactor cultures of HEK293SF cells for influenza virus production, consisting of: (A) low cell density batch (BR-B, infected at  $2 \times 10^6$  cells/mL), (B) perfusion (BR-P<sub>HCD</sub>, infected at  $8.5 \times 10^6$  cells/mL), and (C) hybrid fed-batch/perfusion (BR-FB<sub>HCD</sub>, infected at  $8.5 \times 10^6$  cells/mL)
